# Supplementary material
Source: publisher site journal article supplement (https://www.spandidos-publications.com/7678/downloadSupplementary)
Supplement: Supplementary file 1 [file downloadSupplementary]

## Supplementary material file

Search Terms for the PubMed database as an example:

('Esophageal Neoplasms'[Mesh] OR 'Esophageal Cancer\*'[tiab] OR 'Esophagus Tumor\*'[tiab]) AND

('cfDNA'[tiab] OR 'Circulating Cell-Free DNA'[tiab] OR 'Cell-Free Nucleic Acids'[Mesh]) AND ('Methylation'[Mesh] OR 'DNA Methylation'[tiab] OR 'Epigenetic\*'[tiab]).
